# Supplementary material
Source: PubMed Central journal article supplement (PMC6126737)
Supplement: pnas.1719335115.sapp.pdf [file pnas.1719335115.sapp.pdf]

1  
2  
3  
4

## Supplementary Information for

### **Oceanographic boundaries constrain microbial diversity gradients in the South Pacific Ocean**

Authors: Eric J. Raes<sup>1,2,3\*</sup>, Levente Bodrossy<sup>3</sup>, Jodie van de Kamp<sup>3</sup>, Andrew Bissett<sup>3</sup>, Martin Ostrowski<sup>4</sup>, Mark Brown<sup>5</sup>, Swan L.S. Sow<sup>3,6</sup>, Bernadette Sloyan<sup>3</sup>, and Anya M. Waite<sup>1,7</sup>

1. Alfred Wegener Institute for Polar and Marine Research, Am Handelshafen 12, 27570 Bremerhaven, Germany
2. The Oceans Institute M047, University of Western Australia, Crawley, 6009 WA, Australia
3. CSIRO Oceans and Atmosphere, GPO Box 1538, Hobart, Tasmania, 7001, Australia
4. Macquarie University, Faculty of Science and Engineering, NSW 2109, Australia
5. School of Biotechnology and Biomolecular Sciences, University of NSW Kensington, Sydney, NSW 2052 Australia
6. Institute for Marine and Antarctic Studies, University of Tasmania, Hobart 7001, Tasmania, Australia
7. Universität Bremen, Department Biology-Chemistry, Bibliothekstraße, 1 D-28334, Bremen, Germany

\* Corresponding author: [eric.raes@csiro.au](mailto:eric.raes@csiro.au) current address<sup>3</sup>

5  
6  
7  
8  
9

10 **This PDF file includes:**

11

12 Supplementary text covering materials and methods:

13

1) Biophysical parameters

14

2) Nutrient analysis

15

3) DNA extraction protocol

16

4) Pigment analysis and Table S1

17

4.1. Nanoplankton

18

5) Carbon assimilation rates

19

6) Richness and statistical analyses Table S2 and S3

20

Figures S1 to S9

21

Table S2-S3

22

References for SI

23

24 **Supplementary Information Text**

25

26

27

## 1. **Biophysical parameters**

28

29 A 36-Niskin bottle rosette was fitted with a Seabird SBE32 conductivity-temperature-  
30 depth (CTD) profiler, a SBE43 O<sub>2</sub> sensor, a Chelsea Aqua tracker Fluorometer and a  
31 Wetlabs C-Star™ transmissometer. Transmission was used as a proxy for particle  
32 concentration; areas with high particle concentrations denoted by a low transmission  
33 signal (1) (See figure S1b). Physical, biogeochemical data and metadata can be accessed  
34 through the GO-SHIP data portal ([https://cchdo.ucsd.edu/search?q=GO-SHIP; voyage](https://cchdo.ucsd.edu/search?q=GO-SHIP;voyage096U20160426)  
35 [096U20160426](https://cchdo.ucsd.edu/search?q=GO-SHIP;voyage096U20160426)) and through the CSIRO data portal  
36 ([https://www.cmar.csiro.au/data/trawler/index.cfm; voyage](https://www.cmar.csiro.au/data/trawler/index.cfm;voyageIN2016_V03) IN2016\_V03). Mixed layer  
37 depths (MLD) were calculated according to Talley, Pickard, Emery and Swift (2), as  $\Delta T$   
38 = 0.2 °C compared to a surface reference depth of 7.3 ± 4.5 m. ).

39

40

## 2. **Nutrient analysis**

41

42 Silicate analysis (detection limits to 0.2 μmol L<sup>-1</sup>) was based on Armstrong et al. (1967)  
43 with minor changes to the coil sequence as recommended in Practical Guidelines for the  
44 Analysis of Seawater see Aminot, K erouel and Coverly (3). PO<sub>4</sub><sup>3-</sup> was analysed via the  
45 AA3 method G-297-03 rev3 according to Murphy and Riley (4) with detection limits to  
46 0.01 μmol L<sup>-1</sup>, using 10mm flow cell and a LED lamp. NO<sub>3</sub><sup>-</sup>/NO<sub>2</sub><sup>-</sup> were analysed per  
47 AA3 method G-172-96 rev15 according to Armstrong, Stearns and Strickland (5) and

48 Grasshoff, Kremling and Ehrhardt (6) with detection limits to  $0.015 \mu\text{mol L}^{-1}$  using  
49 10mm flow cells and a LED lamp. Unless elsewhere stated  $\text{NO}_3^-$  and  $\text{NO}_x$  are the sum of  
50  $\text{NO}_3^- + \text{NO}_2^-$ .  $\text{NH}_4^+$  was analysed per AA3 method G-327-05 rev4 according to K  rouel  
51 and Aminot (7) with detection limits to  $0.015 \mu\text{mol L}^{-1}$ , using a JASCO fluorometer FP-  
52 2020. Certified reference materials (CRM) for  $\text{SiO}_4$ ,  $\text{PO}_4^{3-}$ ,  $\text{NO}_3^-$ , and  $\text{NO}_2^-$  in seawater,  
53 produced by KANSO Japan, were used in each nutrient analysis to ensure the accuracy of  
54 results. The Reference CRMs were run 4 times after the calibration standards. Accuracy  
55 was determined by comparing the new standard batch with the old and tracking to ensure  
56 the concentration was within 1% accuracy between batches. The GO-SHIP criteria  
57 (Hydes et al., 2010), reference section 5.3, specifies using 1-3 % of full scale (depending  
58 on the nutrient) as acceptable limits of accuracy.

59

### 60 **3. Extraction Protocol for Sterivex Samples as modified in Appleyard, Abell** 61 **and Watson (8)**

62

#### 63 **Materials**

##### 64 Lysis buffer

65 200mM  $\text{NaH}_2\text{PO}_4 \cdot 2\text{H}_2\text{O}$  (monobasic)

66 200mM  $\text{Na}_2\text{HPO}_4$  (dibasic) MW 142  $142\text{g}/1\text{L} = 1\text{M}$   $5.68\text{g}/200\text{mL} = 200\text{mM}$

##### 67 To make up 200mL lysis buffer

68 39mL 200mM  $\text{NaH}_2\text{PO}_4$

69 61mL 200mM  $\text{Na}_2\text{HPO}_4$

70 17.54g NaCl

71 2g CTAB

72 4g PVP K30 + ddH<sub>2</sub>O to make up to 200ml

73 Adjust to pH 7.0 (using NaOH – try couple of mL of 10M NaOH)

74

##### 75 Lysozyme

76 Proteinase K – 20mg/ml

77 From FastDNA<sup>TM</sup> Spin Kit for Soil (MP Biomedicals)

78 MT buffer From PowerWater<sup>®</sup> Sterivex<sup>TM</sup> DNA Isolation Kit (Qiagen)

79 Columns and sample recovery tubes, 3ml and 20ml syringes, 5ml tubes

80 Buffer ST4 (warmed to 65 °C before use)

81 Buffer ST5 and ST6

82

83 Inlet and outlet caps for Sterivex filters

84

85 Phenol:Chloroform:Isoamyl (25:24:1) (PCI)

86 Chloroform:Isoamyl (24:1) (CI)

87 TE buffer

88

89 **Protocol**

- 90 1. weigh 125 mg lysozyme into 50 mL falcon tube and add 25 mL Lysis Buffer to
- 91 dissolve (lysozyme final conc. 5 mg/ml).
- 92 2. remove filters from -80 °C, remove inlet cap and using a pipette add 1.875 ml
- 93 Lysis buffer (containing 5mg/ml final concentration of lysozyme) and 0.125 ml
- 94 MT buffer.
- 95 3. recap the Sterivex filter and attach filter (with inlet end facing out) to the
- 96 horizontal vortexer, Speed 6 for 60 min (turning the filter a couple of times during
- 97 the hr)
- 98 4. using 3 ml syringe, draw back plunger and attach to inlet end of filter – release
- 99 plunger and buffer in filter should flow into syringe. Divide approx 2 ml of buffer
- 100 evenly into 2 × 2.0 ml tubes
- 101 5. in fume hood, add 900 µl PCI to each tube, invert several times, spin down
- 102 13000/10 min/RT
- 103 6. combine the aqueous phases from both tubes into one 2.0 ml tube (~ 1.5 – 1.8 ml),
- 104 add 20 µl Prot K, and incubate on heat block for 2 hr at 60 °C
- 105 7. in fume hood, add 500 µl CI, spin down 13000/10 min/RT – remove aqueous
- 106 phase to new tube
- 107 8. in fume hood, add 500 µl CI, spin down 13000/5 min/RT – remove aqueous phase
- 108 to new tube
- 109 9. after 2<sup>nd</sup> spin, remove 1 ml of aqueous phase, add to 5 ml tube
- 110 10. add 3 ml of warmed ST4 buffer (65 °C), mix by inversion
- 111 11. attach column to barrel of 20 ml syringe and attach to vacuum manifold
- 112 12. pour contents of 5 ml tube into barrel while still warm
- 113 13. using vacuum, pull contents through the column
- 114 14. while keeping column attached to the manifold, remove barrel and add 800 µl
- 115 ST5 to column
- 116 15. using vacuum, pull contents through the column
- 117 16. add 800 µl ST6 to column
- 118 17. using vacuum, pull contents through the column, then keep on vacuum for 2 mins
- 119 18. turn vacuum off, put column into new 2.0 ml elution tube and let air dry on bench
- 120 for 10 mins
- 121 19. add 80 µl 0.1 x TE to column, incubate at 37 °C for 45 min
- 122 20. spin down column and tube at 13000/2 min/RT to elute DNA
- 123 21. Quantify 2 µl on the Nanodrop and record concentration and 260:280 ratio in
- 124 spreadsheet

125 **Storage and Downstream Applications**

- 126 1. Transfer DNA (total volume approx. 78 µl) to 96 well plate and record well
- 127 location of each sample in spreadsheet.
- 128 2. Using multi-channel pipette, transfer aliquots to further 96 well plates (1 x
- 129 amplicon sequencing, 1 x shotgun metagenomics, then 5 x 10 µl, 2 x 5 µl, and
- 130 remainder for long term storage at -80 °C).

- 131 3. Plates for long term storage are dried down in vacuum centrifuge at 30 °C. Seal  
132 with AlumaSeal CS™ foil film. Place plates in for storage at -80 °C  
133 (Environmental Genomics ultra freezer, CSIRO Hobart).  
134 4. Plates for amplicon sequencing and shotgun metagenomics are sent to Ramaciotti  
135 Centre for Genomics (on dry ice).

136

137

138

#### 4. Pigment analysis

139

140 Chlorophyll *a* extractions were carried out according to Parsons, Takahashi and Hargrave  
141 (9) on 0.525 L of sample water, using 25-mm GF/F filters through gentle vacuum  
142 filtration (pressure drop <10 kPa) at 5 sampling depths within the mixed layer. Samples  
143 were measured on a Turner Trilogy laboratory fluorometer (See figure S1a).

144

145 Four liters of sample water from the surface at each station were filtered in dim-lit light  
146 on 25 mm Whatman GF/F filters for analysis of taxonomically significant chlorophylls  
147 and carotenoids. Samples were snap frozen and stored in liquid N. Photosynthetic  
148 pigments were analyzed using high-performance liquid chromatography (HPLC)  
149 according to Hooker, *et al.* (10). HPLC data were analysed using diagnostic pigments of  
150 dominant phytoplankton functional guilds as well as size classes according to Hirata, *et*  
151 *al.* (11). Phytoplankton size classes (microplankton, nanoplankton and picoplankton)  
152 were calculated according to Hirata, *et al.* (11); See table S1. Processed HPLC data were  
153 analysed using diagnostic pigments of dominant phytoplankton functional guilds as well  
154 as size classes according to Hirata, *et al.* (11). Our data showed that: (1) the total chl *a*  
155 (TChl *a*) made up at least 70% of the total pigment concentration and (2) we had a  
156 regression between TChl *a* and the accessory pigments with a slope of 1.1 and  $r^2 > 0.9$ .  
157  $\sum DP$  is the sum of all diagnostic pigments and is equal to 1.41 Fuco (Fucoxanthin) + 1.41  
158 Perid (Perididin) + 1.27 Hex-fuco (19'-hexanoyloxyfucoxanthin) + 0.6 Allo (Alloxanthin)  
159 + 0.35 But-fuco (19'-but-fucoxanthin) + 1.01 Chl-b (Chlorophyll b) + 0.86 Zea  
160 (Zeaxanthin) = Chl-a (Chlorophyll a) (12). The calculated size classes were  
161 microplankton (20 – 200  $\mu\text{m}$ ), nanoplankton (2 – 20  $\mu\text{m}$ ) and picoplankton (0.2 – 2  $\mu\text{m}$ )  
162 (13). We note that diagnostic pigment analysis has its ambiguities (e.g. fucoxanthin is a  
163 precursor for 19'-butanoyloxyfucoxanthin and 19'-hexanoyloxyfucoxanthin); for more

164 detail, see Aiken, *et al.* (14) and Uitz, Claustre, Morel and Hooker (12). Also the size of  
 165 diatoms can range between the micro and nanoplankton size fraction. We note that some  
 166 diagnostic pigments are shared by several phytoplankton groups and some groups may  
 167 cover a broad size (see also Kheireddine, *et al.* (15)). Nevertheless, this approach has  
 168 shown to give valuable insights in the dominant trends of the phytoplankton community  
 169 and size structure at the regional and seasonal scales (16).

170

171 Table S1: Formulas used for calculation of phytoplankton functional guild and size class  
 172 fractions based on diagnostic pigments after Hirata *et al.* 2011.

| Reference                 | Phytoplankton Size Class / Functional Type | Diagnostic Pigments                               | Estimation Formula                                                                                        |
|---------------------------|--------------------------------------------|---------------------------------------------------|-----------------------------------------------------------------------------------------------------------|
| Hirata <i>et al.</i> 2011 | Diatoms                                    | Fucoxanthin (Fuco)                                | $1.41 * \text{Fuco} / \sum \text{DP}$                                                                     |
|                           | Dinoflagellates                            | Peridinin (Perid)                                 | $1.41 * \text{Perid} / \sum \text{DP}$                                                                    |
|                           | Microplankton                              | Fuco, Perid                                       | $1.41 * (\text{Fuco} + \text{Perid}) / \sum \text{DP}$                                                    |
|                           | Nanoplankton                               | Hex, Chl- <i>b</i> , But-fuco, Alloxanthin (Allo) | $(1.27 * \text{Hex} + 1.01 * \text{Chl-}b + 0.35 * \text{But-fuco} + 0.6 * \text{Allo}) / \sum \text{DP}$ |
|                           | Picoplankton                               | Zea, Hex, Chl- <i>b</i>                           | $(0.86 * \text{Zea} + 1.27 * \text{Hex}) / \sum \text{DP}$                                                |

173

174 The HPLC data set are available at <https://doi.pangaea.de/10.1594/PANGAEA.884052>  
 175 (17).

176

#### 177 **4.1 Nanoplankton**

178

179 We found that nanoplanktonic guilds (prymnesiophytes in particular) were present in all  
 180 oceanic provinces. The proportion of nanoplankton within the community varied between  
 181 15-20 % at 60 °S and in the equatorial region, but up to 65 % at 55 °S (near the STF).

182 The sharp increase in prymnesiophytes coincided with the abrupt disappearance of  
 183 diatoms, while the minima corresponded to maximal microplankton and picoplankton  
 184 abundances, in the Southern Ocean and equatorial regions respectively. Both the  
 185 prymnesiophytes and the pico-eukaryotes contributed up to 83% to the phytoplankton  
 186 guild fraction within the STF. The overall prevalence of prymnesiophytes reaffirms that

187 this group could be an important player in CO<sub>2</sub> fixation, as mentioned by Jardillier,  
188 Zubkov, Pearman and Scanlan (18) in subtropical and tropical ecosystem. Our data  
189 highlights that the prymnesiophytes are even present south of the STF.

190

## 191 **5. Carbon assimilation rates**

192

193 At each CTD station, water samples to measure C-assimilation rates were taken from the  
194 clean underway flow through system (intake at 6m). Triplicate C-assimilation  
195 experiments were initiated by adding 20  $\mu\text{mol L}^{-1}$  of NaH<sup>13</sup>CO<sub>3</sub> to polycarbonate one-  
196 liter incubation bottles. All incubation bottles were acid rinsed three times, rinsed two  
197 times with deionized water, and rinsed three times with seawater directly from the sample  
198 point prior to incubation. Polycarbonate bottles were placed in on-deck incubators where  
199 temperature regulation was maintained by a continuous surface seawater flow. After 24 h  
200 incubation the experiments were terminated by filtering each bottle (pressure drop <10  
201 kPa) through a 25 mm precombusted GF/F filter. The natural abundance of the particulate  
202 organic carbon (POC), used as t-zero values to calculate assimilation rates, were obtained  
203 by filtering four liters of water onto pre-combusted GF/F filters for each station. All  
204 filters, enriched and natural abundance, were snap frozen in liquid N and stored at -80°C.  
205 Filters were later acidified and dried overnight at 60 °C. Determination of total C and  
206  $\delta^{13}\text{C}$  was carried out using a continuous flow system consisting of a SERCON 20-22  
207 mass spectrometer connected with an Automated C analyser at the Stable Isotope Facility  
208 of the University of California Davis. The external error of analyses (1 std dev) was 0.15  
209 permille (‰) for  $\delta^{13}\text{C}$ . C assimilation rates ( $\text{nmol C L}^{-1} \text{ h}^{-1}$ ) were calculated following the  
210 equations described in Knap, Michaels, Close, Ducklow and Dickson (19). Primary  
211 productivity are available at <https://doi.pangaea.de/10.1594/PANGAEA.884052> (17).

212

213

## 214 **6. Richness and statistical analyses**

215

216 All analyses utilised sub-sampled OTU tables as described above. Pro- and eukaryotic  
217 richness were calculated as the number of 97% OTUs observed per sample (20). Absolute  
218 latitudinal ranges of OTUs were calculated as the difference between the maximum and

219 minimum latitudes where an OTU was present (eg., an OTU occurring at 50° S, 40° S  
220 and 30° S would have an absolute latitudinal range of 20° (21). Correlations were  
221 calculated using the Spearman coefficient  $r_s$  as a measure of rank correlation using the  
222 Corrplot and Vegan packages in R studio (22), see Figs. S2 and Fig. S3. In contrast to the  
223 Pearson coefficient, it assesses monotonic relationships, not purely linear relationships.  
224 Multiple error rates were corrected using Holm' method (23). Productivity and richness  
225 relationships were assessed with linear, cubic and quadratic regressions.

226

### 227 *Boosted regression trees*

228 Boosted regression trees Predictor variable influence on pro and eukaryotic richness was  
229 assessed using boosted regression trees (see Elith, Leathwick and Hastie (24)).  
230 Through computerised boosting, BRT optimises model predictive performance through  
231 forward step-wise fitting of many simple models, combining their predictive capability to  
232 give more weight to residual variation that remains unexplained (Elith et al., 2008). Like  
233 regression trees, BRT is robust to missing and unbalanced data, outliers and non-linear  
234 relationships (24). Cross-validation (cv correlation in the manuscript Tables 1 and 2) is a  
235 technique to evaluate how predictive the model is by partitioning the original data into a  
236 training set to train the model, and a test set to evaluate it. In k-fold cross-validation, the  
237 original sample is randomly partitioned into k equal size subsamples. The tenfold cross  
238 validation correlation value is comparable to an  $r^2$  value. See also 'A working guide to  
239 boosted regression trees' (24). We did not consider day lengths as a predictor in our BRT  
240 models as these increased linearly with latitude (see Fig. S9). BRT was implemented in  
241 the R software environment using the `gbm.step` function, a gaussian error structure, 10  
242 fold cross-validation and the following settings which resulted in models with > 2000  
243 trees in all cases; `learning.rate = 0.001`, `tree.complexity = 10`, `bag.fraction = 0.5` (24).

244

245

246

247

248

249



250  
251

**Supplementary Table S2.**

| <b>Archaeal richness - MLD</b> |                        | <b>Bacterial richness - MLD</b> |                        | <b>Eukaryote richness - MLD</b> |                        |
|--------------------------------|------------------------|---------------------------------|------------------------|---------------------------------|------------------------|
| Predictor variable             | Relative influence (%) | Predictor variable              | Relative influence (%) | Predictor variable              | Relative influence (%) |
| Temperature                    | 21.4                   | Temperature                     | 24.3                   | Si                              | 34.7                   |
| PP                             | 14.1                   | PP                              | 13.4                   | NO <sub>3</sub> <sup>-</sup>    | 12.1                   |
| NO <sub>2</sub> <sup>-</sup>   | 13.6                   | NO <sub>2</sub> <sup>-</sup>    | 12.5                   | Temperature                     | 11.1                   |
| Salinity                       | 9.9                    | MLD                             | 10.1                   | TChl_a                          | 7.4                    |
| Si                             | 8.5                    | Salinity                        | 8.2                    | PO <sub>4</sub> <sup>3-</sup>   | 7.3                    |
| NO <sub>3</sub> <sup>-</sup>   | 7.8                    | NO <sub>3</sub> <sup>-</sup>    | 7.6                    | NH <sub>4</sub> <sup>+</sup>    | 5.9                    |
| MLD                            | 7.2                    | Si                              | 6.9                    | MLD                             | 5.5                    |
| TChl_a                         | 6.7                    | NH <sub>4</sub> <sup>+</sup>    | 6.5                    | NO <sub>2</sub> <sup>-</sup>    | 5.1                    |
| NH <sub>4</sub> <sup>+</sup>   | 6.1                    | TChl_a                          | 6.0                    | PP                              | 4.6                    |
| Oxygen                         | 3.0                    | Oxygen                          | 2.7                    | Salinity                        | 4.4                    |
| PO <sub>4</sub> <sup>3-</sup>  | 1.8                    | PO <sub>4</sub> <sup>3-</sup>   | 1.8                    | Oxygen                          | 1.9                    |
| training data correlation      | 0.959                  | training data correlation       | 0.934                  | training data correlation       | 0.896                  |
| cv correlation ± se            | 0.844±0.022            | cv correlation ± se             | 0.826±0.038            | cv correlation ± se             | 0.793±0.04             |

252  
253  
254  
255  
256  
257  
258  
259  
260  
261  
262  
263  
264  
265  
266  
267  
268

**Table S2.** Percentage relative influence of 11 predictor variables in explaining variation in pro- and eukaryotic richness from samples just below the mixed layer depth (n=89) along the p15S GO-SHIP transect determined by BRT (see also Elith, Leathwick and Hastie (24)). Predictor variables: Primary productivity of the surface layer (PP); Mixed Layer Depth (MLD); NO<sub>x</sub> (NO<sub>3</sub><sup>-</sup> + NO<sub>2</sub><sup>-</sup>); Note: phytoplankton size classes and taxonomic groups derived from HPLC analysis are not included as these were obtained from surface samples only.

269 *Non multi-dimensional scaling (nMDS) and Analysis of Similarities (ANOSIM)*

270

271 **Table S3: Tests for differences between unordered Oceanographic Biomes.**

ANOSIM – OCEANOGRAPHIC BIOMES 16S - BACTERIA

PAIRWISE TESTS

| GROUPS                     | R         | Significance |
|----------------------------|-----------|--------------|
|                            | Statistic | Level %      |
| SO, STF                    | 0.844     | 0.1          |
| SO, TROP. OLIGO            | 0.997     | 0.1          |
| SO, EQ. UPWELLING          | 1         | 0.1          |
| STF, TROP. OLIGO           | 0.827     | 0.1          |
| STF, EQ. UPWELLING         | 0.981     | 0.1          |
| TROP. OLIGO, EQ. UPWELLING | 0.344     | 0.1          |

272

ANOSIM – OCEANOGRAPHIC BIOMES 16S - ARCHAEA

PAIRWISE TESTS

| GROUPS                     | R         | Significance |
|----------------------------|-----------|--------------|
|                            | Statistic | Level %      |
| SO, STF                    | 0.828     | 0.1          |
| SO, TROP. OLIGO            | 0.993     | 0.1          |
| STF, TROP. OLIGO           | 0.821     | 0.1          |
| SO, EQ. UPWELLING          | 1         | 0.1          |
| STF, EQ. UPWELLING         | 1         | 0.1          |
| TROP. OLIGO, EQ. UPWELLING | 0.216     | 0.2          |

273

ANOSIM – OCEANOGRAPHIC BIOMES 18S - EUKARYOTES

PAIRWISE TESTS

| GROUPS                     | R         | Significance |
|----------------------------|-----------|--------------|
|                            | Statistic | Level %      |
| SO, STF                    | 0.824     | 0.1          |
| SO, TROP. OLIGO            | 0.984     | 0.1          |
| SO, EQ. UPWELLING          | 0.991     | 0.1          |
| STF, TROP. OLIGO           | 0.731     | 0.1          |
| STF, EQ. UPWELLING         | 0.882     | 0.1          |
| TROP. OLIGO, EQ. UPWELLING | 0.598     | 0.1          |

274

275

276

277 Groups: SO = Southern Ocean; STF = Subtropical Front; Trop. Oligo = Tropical

278 Oligotrophic; Eq. upwelling = Equatorial upwelling.

279

280 ANOSIM provides a way to test statistically whether there is a significant difference  
281 between two or more groups of sampling units. If two groups of sampling units are really  
282 different in their species composition, then compositional dissimilarities between the  
283 groups ought to be greater than those within the groups. The ANOSIM statistic R is based  
284 on the difference of mean ranks between groups ( $r_B$ ) and within groups ( $r_W$ ).

285

286

$$R = (r_B - r_W) / (N(N-1) / 4)$$

287

288 The divisor is chosen so that R will be in the interval -1 ... +1, value 0 indicating  
289 completely random grouping. Note the significance level is express as %, to obtain the  
290 actual P value you need to dive by 100. For more information see Clarke and Warwick  
291 (25).

292

293

294

295 Supplementary Figures  
296  
297  
298  
299  
300

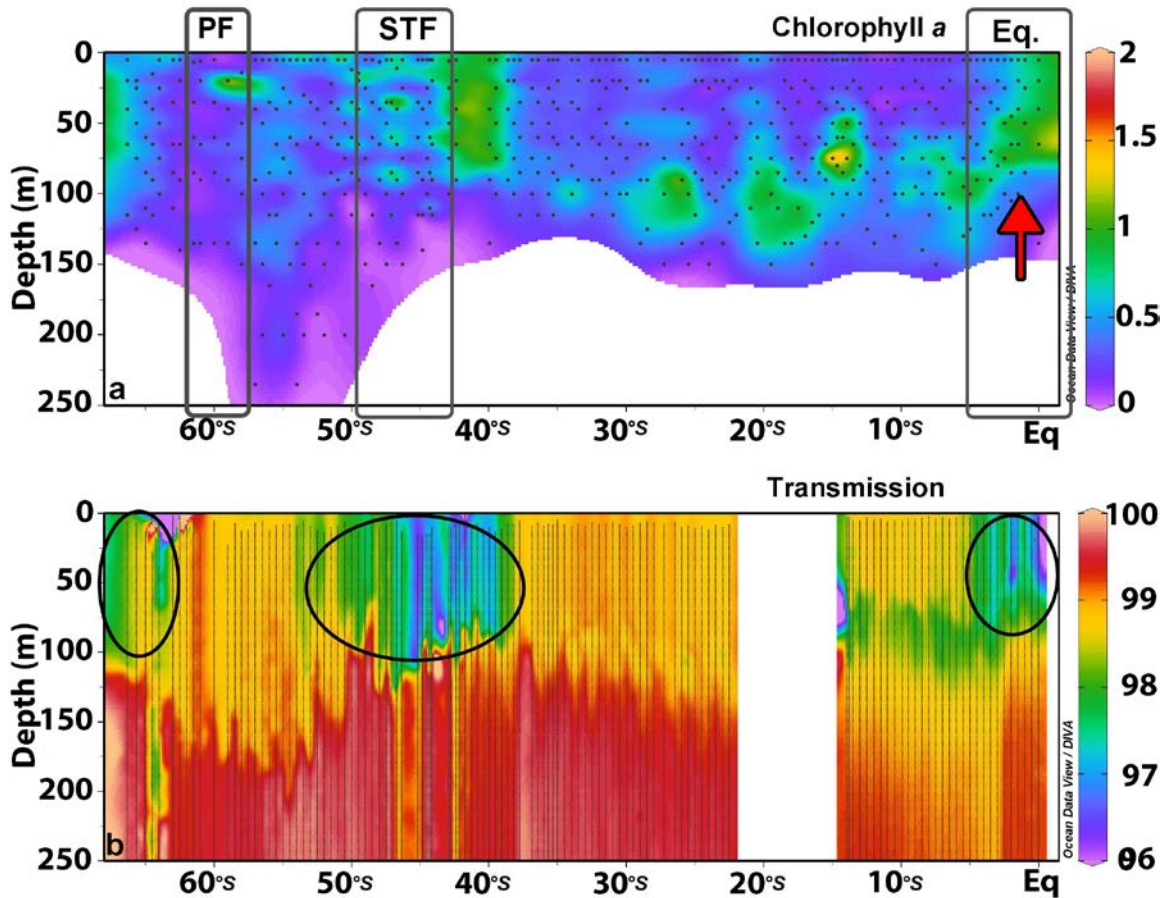

301  
302  
303  
304  
305 **Fig. S1: a)** Chlorophyll *a* concentrations (in  $\mu\text{g L}^{-1}$ ) along the P15S GO-SHIP transect, **b)**  
306 Transmission (in %), used as a proxy for particle concentration (1) along the P15S GO-  
307 SHIP transect. Black dots on **a)** denote sampling depths for chlorophyll *a* measurements.  
308 The polar front, subtropical front and the equatorial upwelling provinces are highlighted  
309 by grey rectangles. The red arrow highlights upwelling of colder, relatively nutrient  
310 richer waters. Thin grey lines on **b)** denote sampling stations, and black circles highlight  
311 low transmission signals (= areas with high particle concentrations).  
312  
313

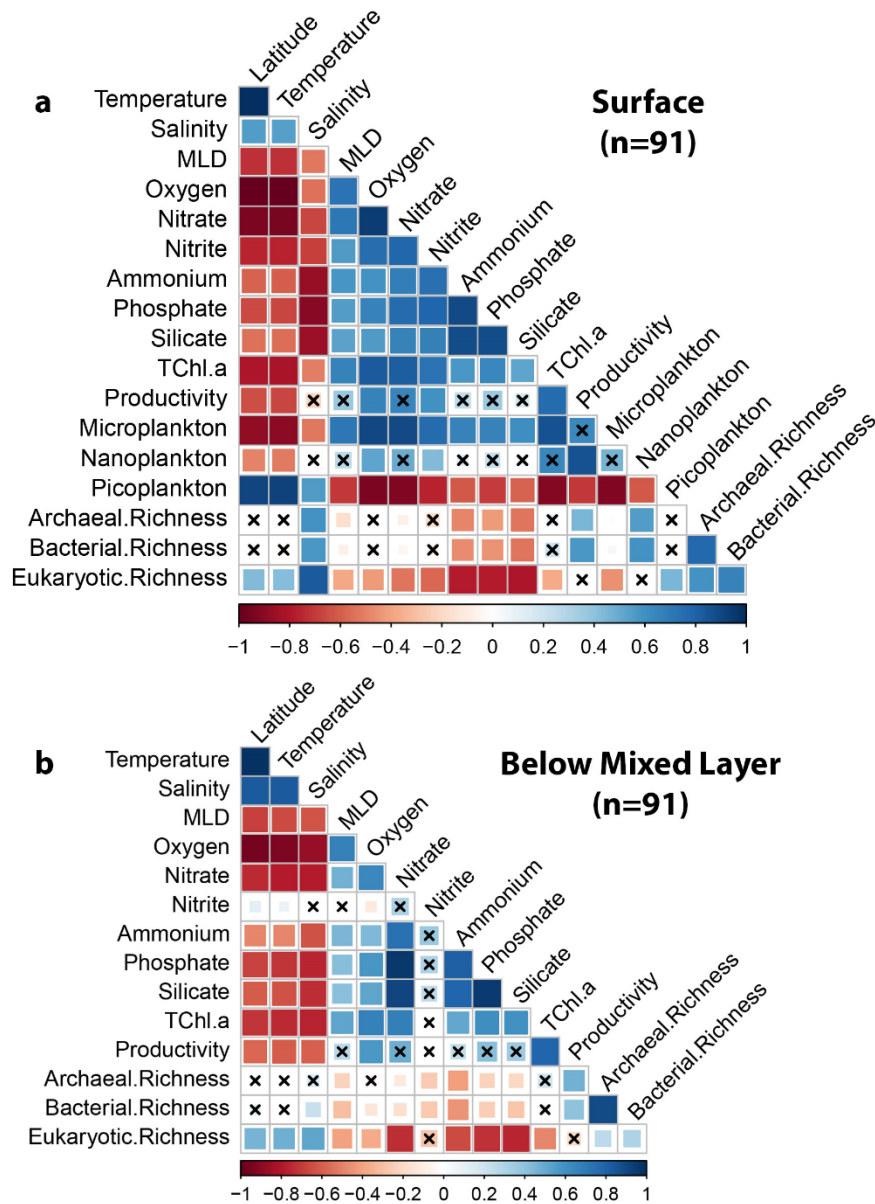

314  
 315  
 316  
 317  
 318  
 319  
 320  
 321  
 322  
 323  
 324  
 325  
 326  
 327  
 328

**Fig. S2:** Spearman correlation coefficients ( $r_s$ ) plots for pro- and eukaryotic richness and biogeochemical parameters. Top figure **a**) shows the samples from the surface waters and bottom figure **b**) shows the samples just below the mixed layer depth. Phytoplankton size classes derived from HPLC analysis are denoted: Microphytoplankton (20 – 200  $\mu\text{m}$ ), Nanophytoplankton (2 – 20  $\mu\text{m}$ ) and Picophytoplankton (0.2 – 2  $\mu\text{m}$ ). Positive correlations are displayed in blue and negative correlations in red. Colour intensity and the size of the squares are proportional to the correlation coefficients. P values  $> 0.05$  are indicated by black crosses. Note primary productivity values used in the correlation plot are averages from three replicates.

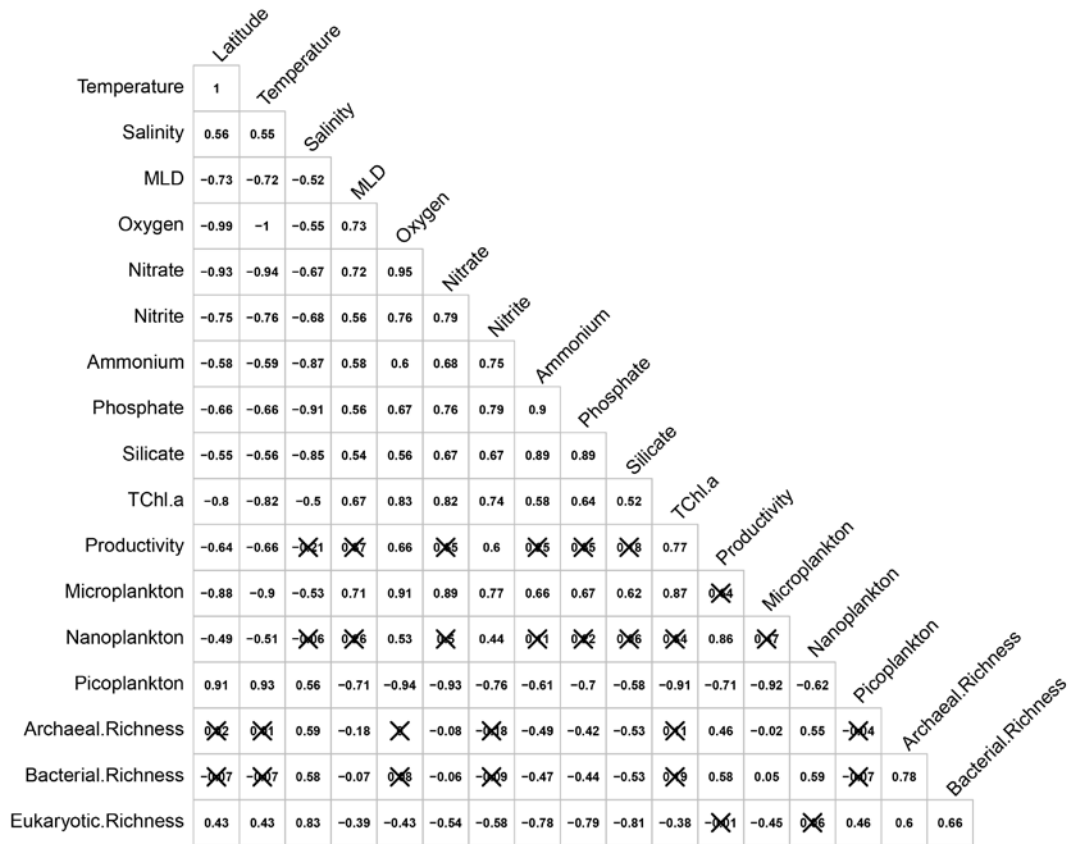

329  
 330  
 331  
 332  
 333  
 334  
 335

**Fig. S2c:** Spearman correlation coefficients (rs) plot for pro-and eukaryotic richness and biogeochemical parameters from the surface waters P values > 0.05 are indicated by black crosses. Note primary productivity values used in the correlation plot are averages from three replicates.

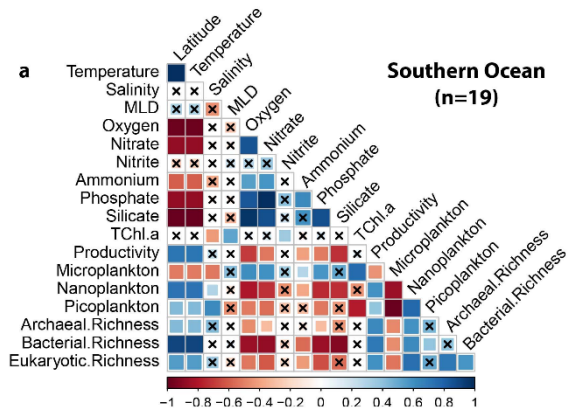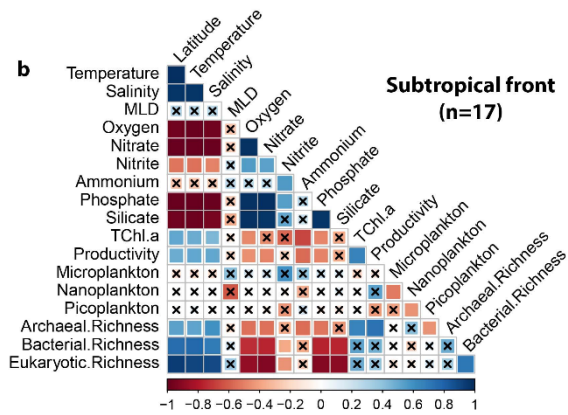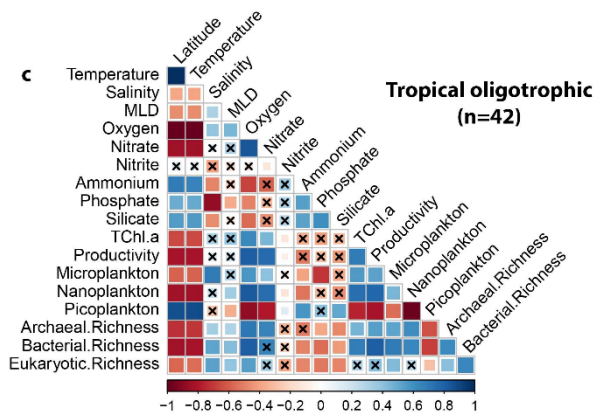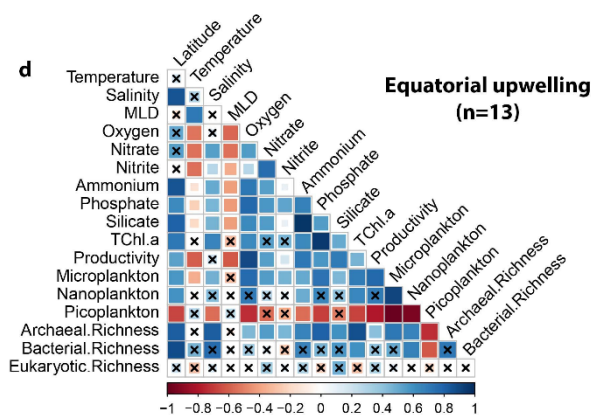

337 **Fig. S3** Spearman correlation coefficients ( $r_s$ ) plots for pro-and eukaryotic richness and  
338 biogeochemical parameters for four different oceanic provinces in the surface waters of  
339 the South Pacific Ocean. **a)** Southern Ocean, **b)** Subtropical front, **c)** Tropical  
340 oligotrophic and **d)** Equatorial upwelling. Phytoplankton size classes derived from HPLC  
341 analysis: Microplankton (20 – 200  $\mu\text{m}$ ), Nanoplankton (2 – 20  $\mu\text{m}$ ) and Picoplankton (0.2  
342 – 2  $\mu\text{m}$ ). Positive correlations are displayed in blue and negative correlations in red.  
343 Colour intensity and the size of the squares are proportional to the correlation  
344 coefficients. P values > 0.05 are indicated by black crosses. Note primary productivity  
345 values used to make the correlation plots are averages from three replicates.  
346  
347  
348  
349  
350  
351  
352  
353  
354  
355  
356  
357  
358  
359  
360  
361  
362  
363  
364



a

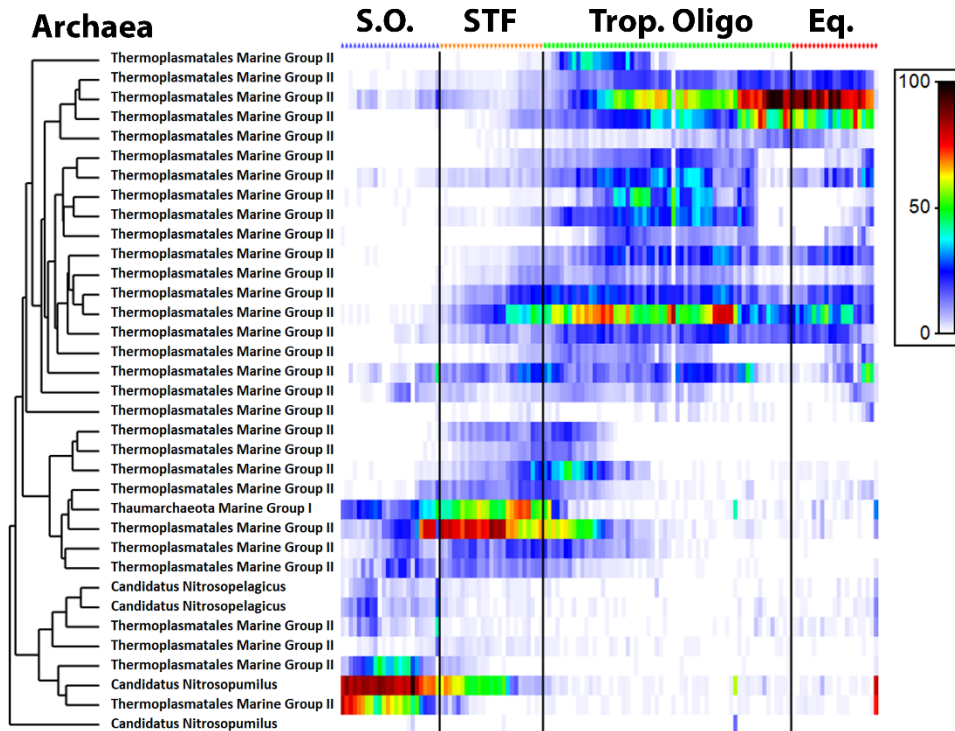

365  
366  
367  
368  
369  
370  
371  
372  
373  
374  
375  
376  
377  
378  
379  
380  
381

**Fig. S4 a)** Heat map of the archaeal Domain. Most abundant sequences of the OTU matrix are displayed and sequence reads for both archaea and bacteria are square root transformed. Colour bar denotes sequence abundance. Dendrogram is not a phylogenetic tree, but illustrates the clustering of strongly correlated OTUs. Blue, orange, green and red symbols above the heatmaps denote CTD stations in their respective oceanographic provinces.

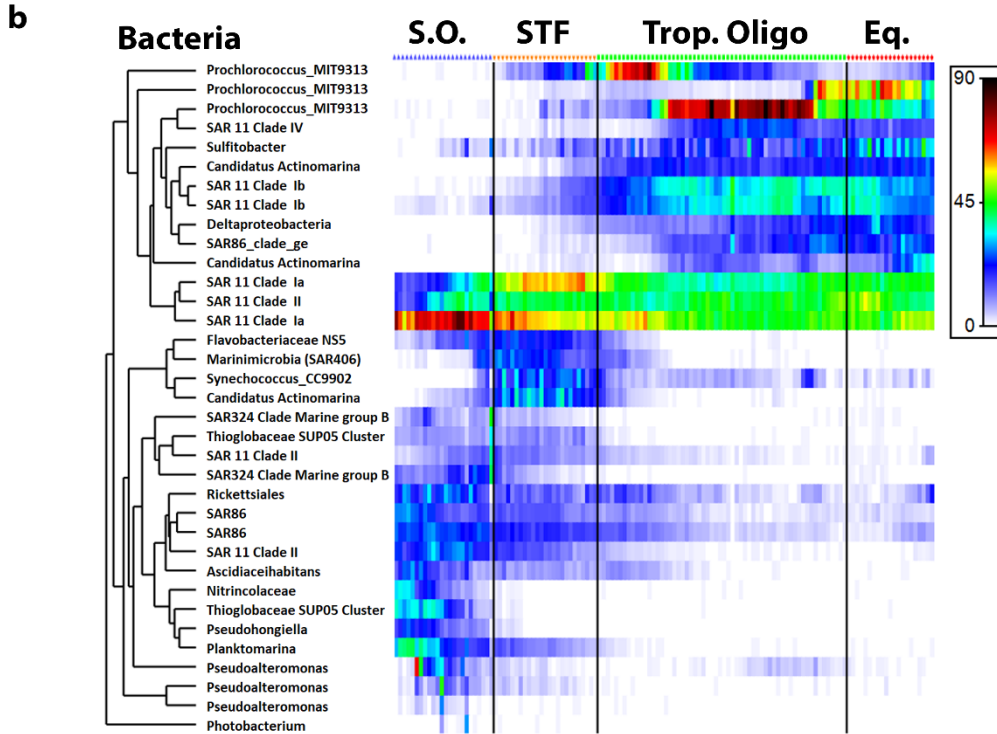

382  
 383  
 384  
 385  
 386  
 387  
 388  
 389  
 390  
 391  
 392  
 393  
 394  
 395  
 396  
 397  
 398  
 399  
 400  
 401

**Fig. S4 b)** Heat map of the bacterial Domain. Most abundant sequences of the OTU matrix are displayed and sequence reads for both archaea and bacteria are square root transformed. Colour bar denotes sequence abundance. Dendrogram is not a phylogenetic tree, but illustrates the clustering of strongly correlated OTUs. Blue, orange, green and red symbols above the heatmaps denote CTD stations in their respective oceanographic provinces.

c

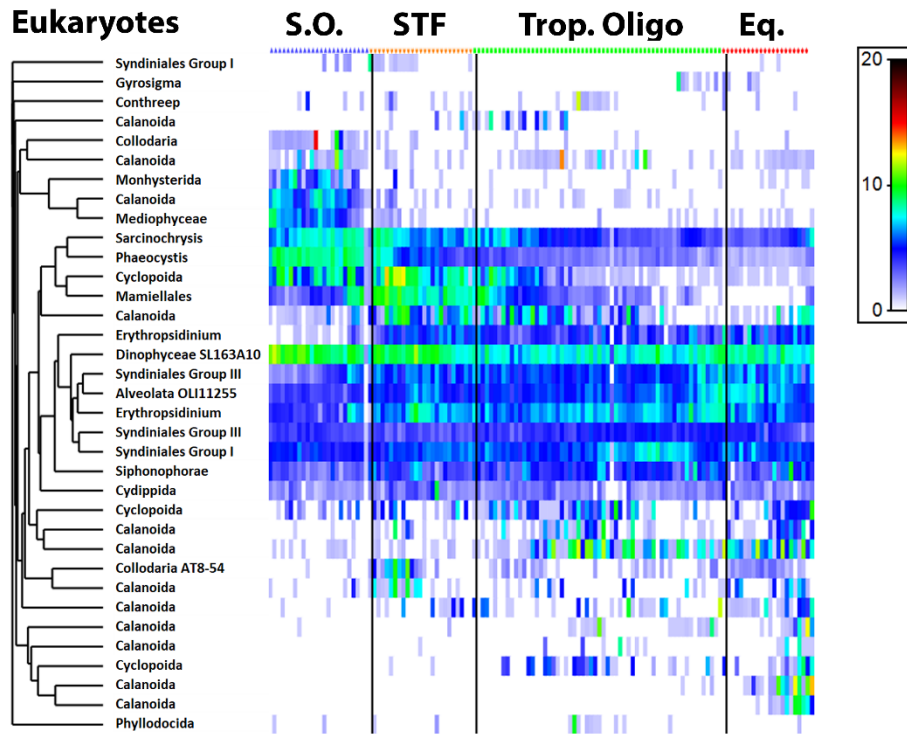

402  
 403  
 404  
 405  
 406  
 407  
 408  
 409  
 410  
 411  
 412  
 413  
 414

**Fig. S4 c)** Heat map of the eukaryotic Domain. Most abundant sequences of the OTU matrix are displayed and sequence reads for both archaea and bacteria are square root transformed. Colour bar denotes sequence abundance. Dendrogram is not a phylogenetic tree, but illustrates the clustering of strongly correlated OTUs. Blue, orange, green and red symbols above the heatmaps denote CTD stations in their respective oceanographic provinces.

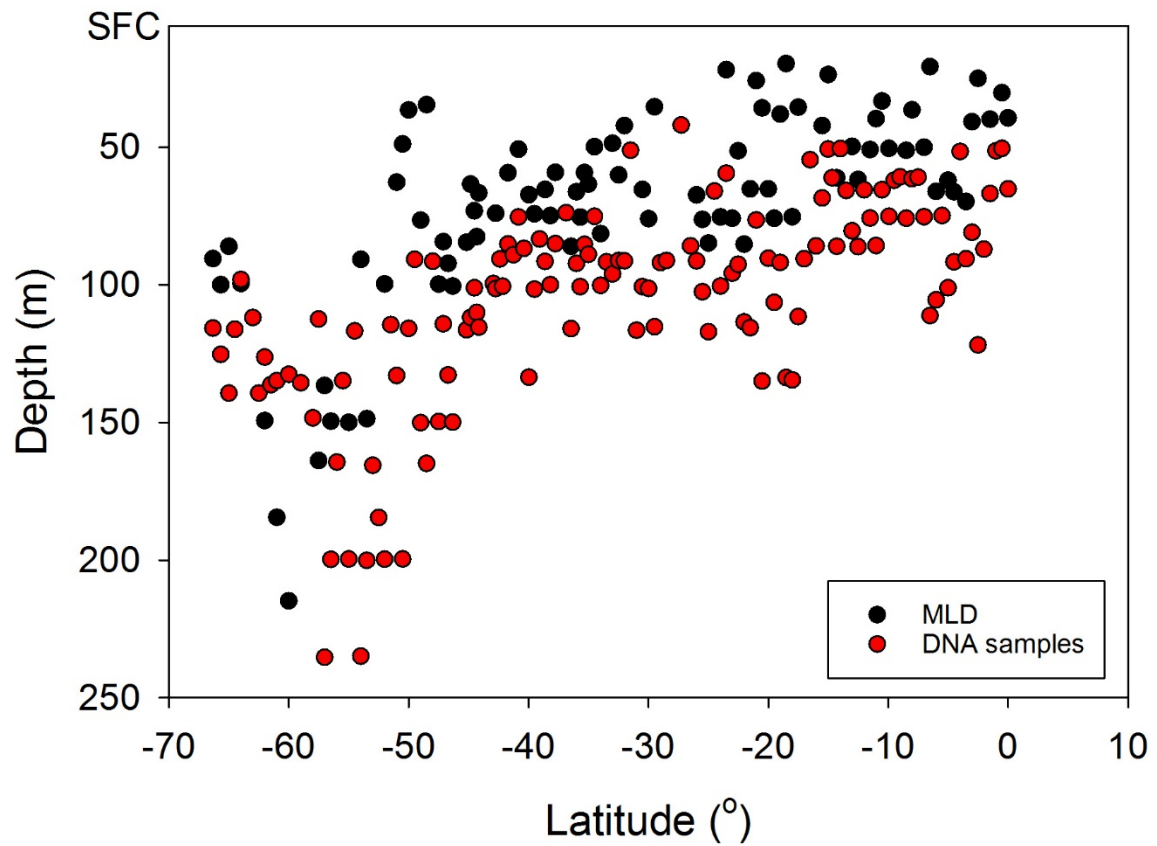

415  
 416  
 417  
 418  
 419  
 420

**Fig. S5.** Mixed layer depths were calculated according to Talley, Pickard, Emery and Swift (2), as a  $\Delta T = 0.2$  °C compared to a surface reference depth. Mixed layer depths are denoted in black circles on the graph. DNA sampling depths are highlighted in red circles.

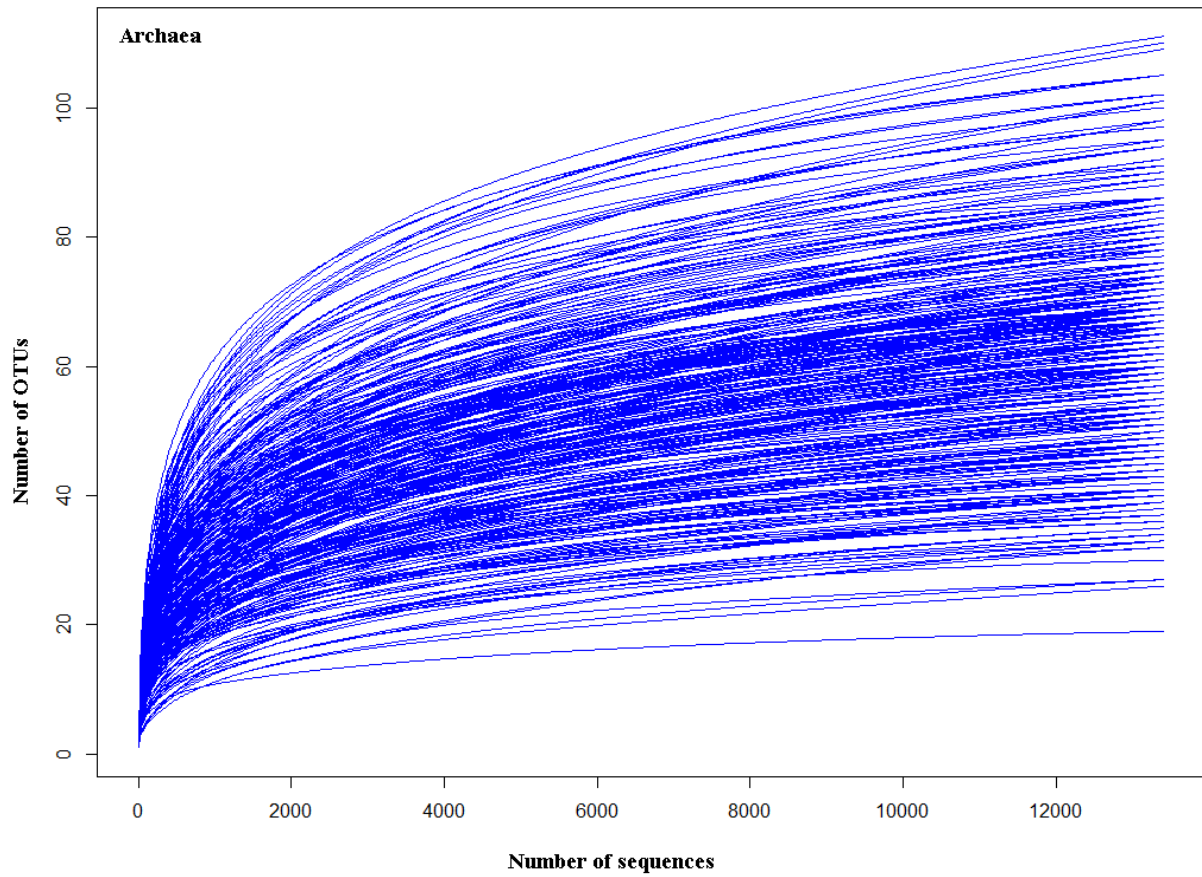

421  
422  
423

**Fig. S6:** Rarefaction curves for Archaea, subsampled to a depth of 13400 sequences.

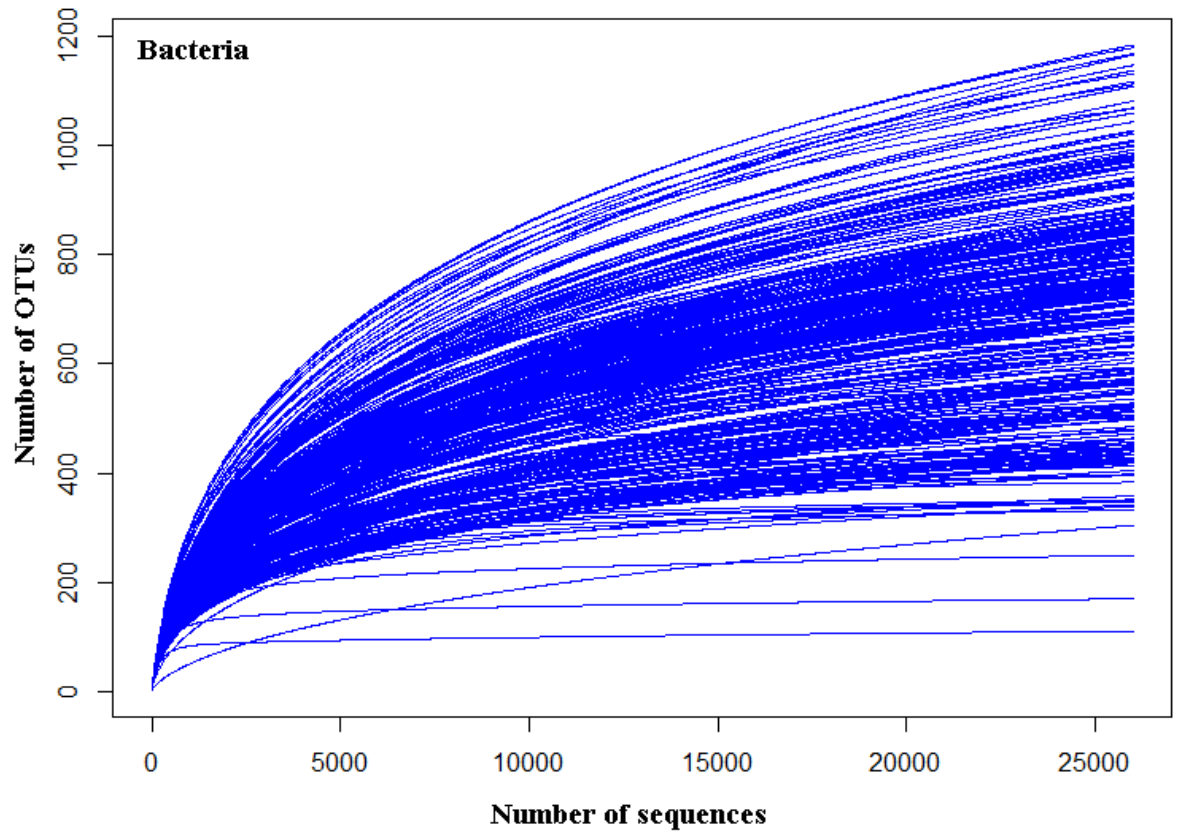

424  
425  
426  
427

**Fig. S7:** Rarefaction curves for bacteria, subsampled to a depth of 13400 sequences.

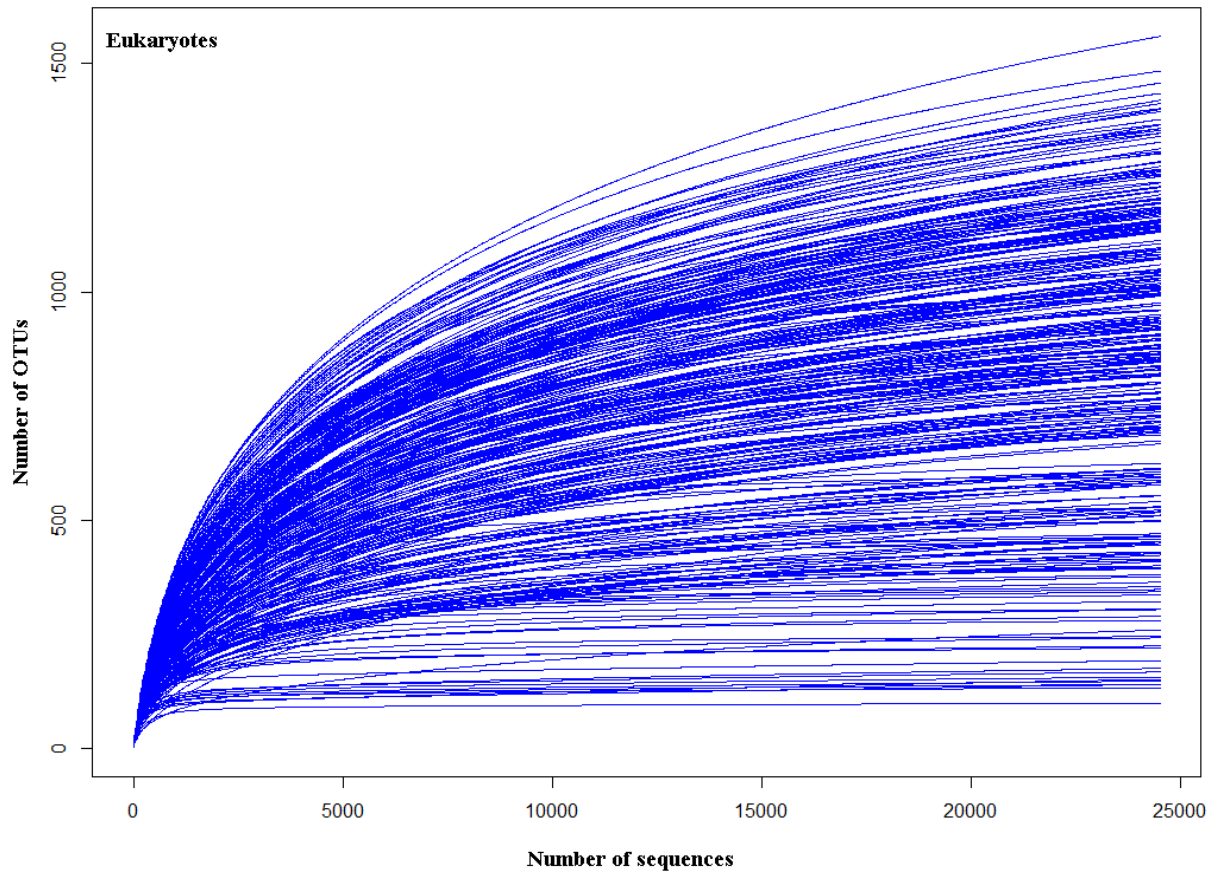

428  
429  
430

**Fig. S8:** Rarefaction curves for eukaryotes, subsampled to a depth of 24500 sequences.

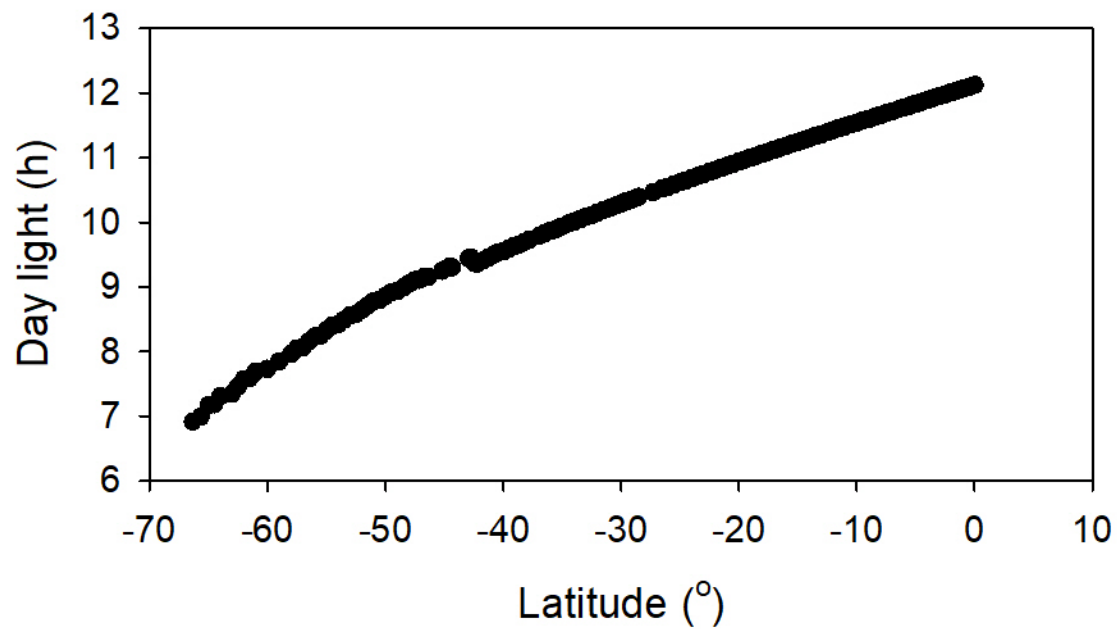

431  
432 **Fig. S9:** Hours of day light along the latitudinal P15S GO-SHIP transect in early Austral  
433 winter in the South Pacific Ocean.  
434  
435  
436  
437  
438



439 **References**

- 440 1. Karageorgis AP, *et al.* (2008) Particle dynamics in the Eastern Mediterranean  
441 Sea: A synthesis based on light transmission, PMC, and POC archives (1991–  
442 2001). *Deep Sea Research Part I: Oceanographic Research Papers* 55(2):177-  
443 202.
- 444 2. Talley L, Pickard G, Emery W, & Swift J (2011) Descriptive Physical  
445 Oceanography - An Introduction.
- 446 3. Aminot A, K erouel R, & Coverly SC (2009) Nutrients in seawater using  
447 segmented flow analysis. *Practical guidelines for the analysis of seawater*:143-  
448 178.
- 449 4. Murphy J & Riley J (1962) A modified single solution method for the  
450 determination of phosphate in natural waters. *Anal. Chim. Acta* 27:31 - 36.
- 451 5. Armstrong FAJ, Stearns CR, & Strickland JDH (1967) The measurement of  
452 upwelling and subsequent biological process by means of the Technicon  
453 Autoanalyzer® and associated equipment. *Deep Sea Res. Oceanogr. Abstr.*  
454 14:381 - 389.
- 455 6. Grasshoff K, Kremling K, & Ehrhardt M eds (2009) *Methods of seawater analysis*  
456 (Wiley-VCH, Weinheim, Germany), 3<sup>rd</sup> edition Ed.
- 457 7. K erouel R & Aminot A (1997) Fluorometric determination of ammonia in sea and  
458 estuarine waters by direct segmented flow analysis. *Mar. Chem.* 57:265 - 275.
- 459 8. Appleyard S, Abell G, & Watson R (2013) Tackling microbial related issues in  
460 cultured shellfish via integrated molecular and water chemistry approaches. in  
461 *Seafood CRC Final Report (2011/729) April 2013. ISBN ISBN 9781922173980*  
462 (*ebook*), 89pp.
- 463 9. Parsons TR, Takahashi M, & Hargrave B (2013) *Biological oceanographic*  
464 *processes* (Elsevier).
- 465 10. Hooker SB, *et al.* (2005) The second SeaWiFS HPLC analysis round-robin  
466 experiment (SeaHARRE-2). *NASA Tech. Memo* 212785:124.
- 467 11. Hirata T, *et al.* (2011) Synoptic relationships between surface Chlorophyll-a and  
468 diagnostic pigments specific to phytoplankton functional types. *Biogeosciences*  
469 8(2):311.
- 470 12. Uitz J, Claustre H, Morel A, & Hooker SB (2006) Vertical distribution of  
471 phytoplankton communities in open ocean: An assessment based on surface  
472 chlorophyll. *Journal of Geophysical Research: Oceans* 111(C8).
- 473 13. Sieburth JM, Smetacek V, & Lenz J (1978) Pelagic ecosystem structure:  
474 heterotrophic compartments of the plankton and their relationship to plankton size  
475 fractions. *Limnology and oceanography* 23(6):1256-1263.
- 476 14. Aiken J, *et al.* (2009) Phytoplankton pigments and functional types in the Atlantic  
477 Ocean: a decadal assessment, 1995–2005. *Deep Sea Research Part II: Topical*  
478 *Studies in Oceanography* 56(15):899-917.
- 479 15. Kheireddine M, *et al.* (2017) Assessing pigment-based phytoplankton community  
480 distributions in the Red Sea. *Frontiers in Marine Science* 4:132.
- 481 16. Ras J, Claustre H, & Uitz J (2008) Spatial variability of phytoplankton pigment  
482 distributions in the Subtropical South Pacific Ocean: comparison between in situ  
483 and predicted data. *Biogeosciences* 5(2):353-369.

- 484 17. Raes EJ, Clementson L, Bodrossy L, Strutton P, & Waite AM (2017) Pigment and  
485 primary productivity on the P15S GO-SHIP transect: From the ice edge to the  
486 equator along 170°W. (PANGAEA).
- 487 18. Jardillier L, Zubkov MV, Pearman J, & Scanlan DJ (2010) Significant CO<sub>2</sub>  
488 fixation by small prymnesiophytes in the subtropical and tropical northeast  
489 Atlantic Ocean. *The ISME journal* 4(9):1180-1192.
- 490 19. Knap A, Michaels A, Close A, Ducklow H, & Dickson A (1996) Protocols for the  
491 joint global ocean flux study (JGOFS) core measurements.
- 492 20. Fuhrman JA, *et al.* (2008) A latitudinal diversity gradient in planktonic marine  
493 bacteria. *Proceedings of the National Academy of Sciences* 105(22):7774-7778.
- 494 21. Amend AS, *et al.* (2013) Macroecological patterns of marine bacteria on a global  
495 scale. *Journal of Biogeography* 40(4):800-811.
- 496 22. Team R (2015) RStudio: integrated development for R. *RStudio, Inc., Boston, MA*  
497 URL <http://www.rstudio.com>.
- 498 23. Holm S (1979) A simple sequentially rejective multiple test procedure.  
499 *Scandinavian journal of statistics*:65-70.
- 500 24. Elith J, Leathwick JR, & Hastie T (2008) A working guide to boosted regression  
501 trees. *Journal of Animal Ecology* 77(4):802-813.
- 502 25. Clarke KR & Warwick R (2001) Change in marine communities. *An approach to*  
503 *statistical analysis and interpretation*.
- 504
